# Supplementary material
Source: publisher figshare collection journal article supplement (https://gsapubs.figshare.com/articles/dataset/_/21528918)

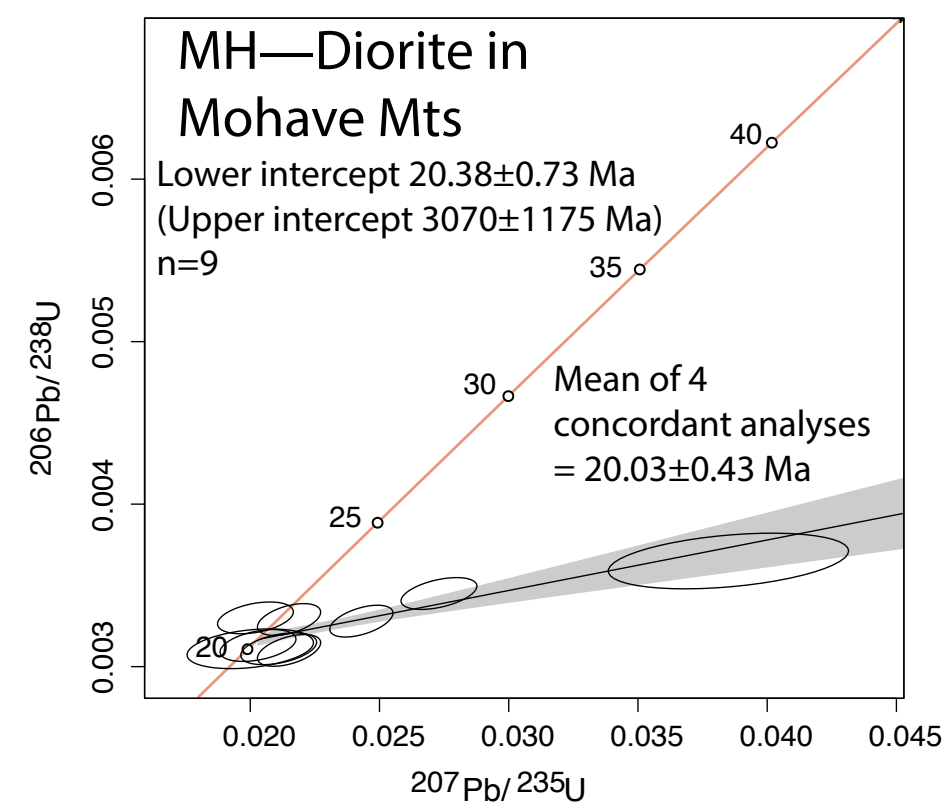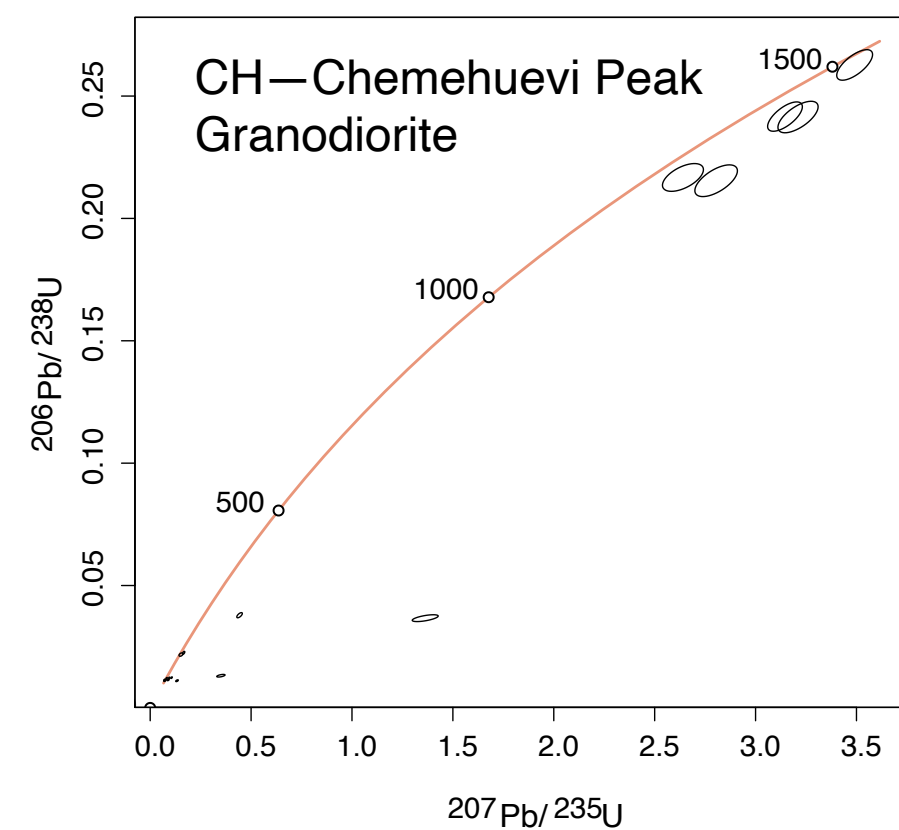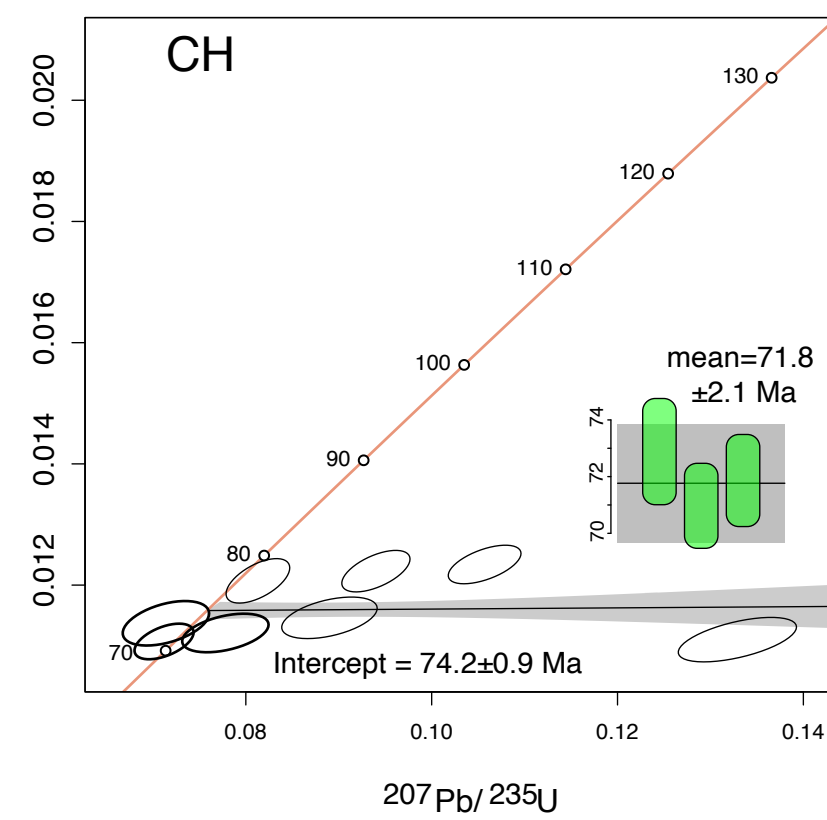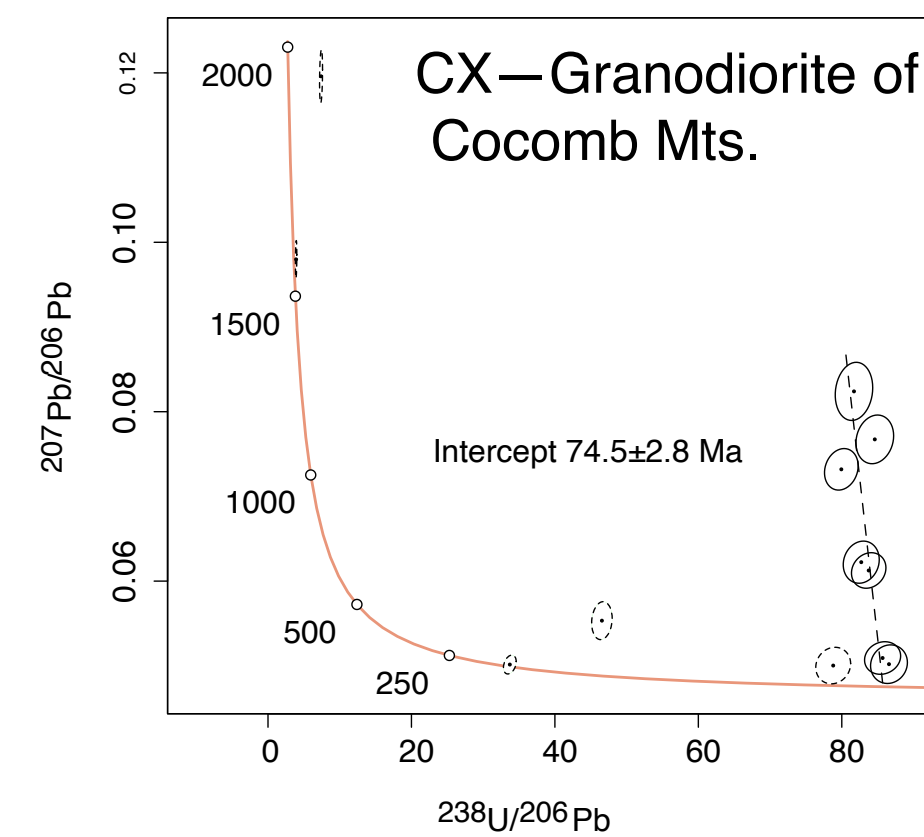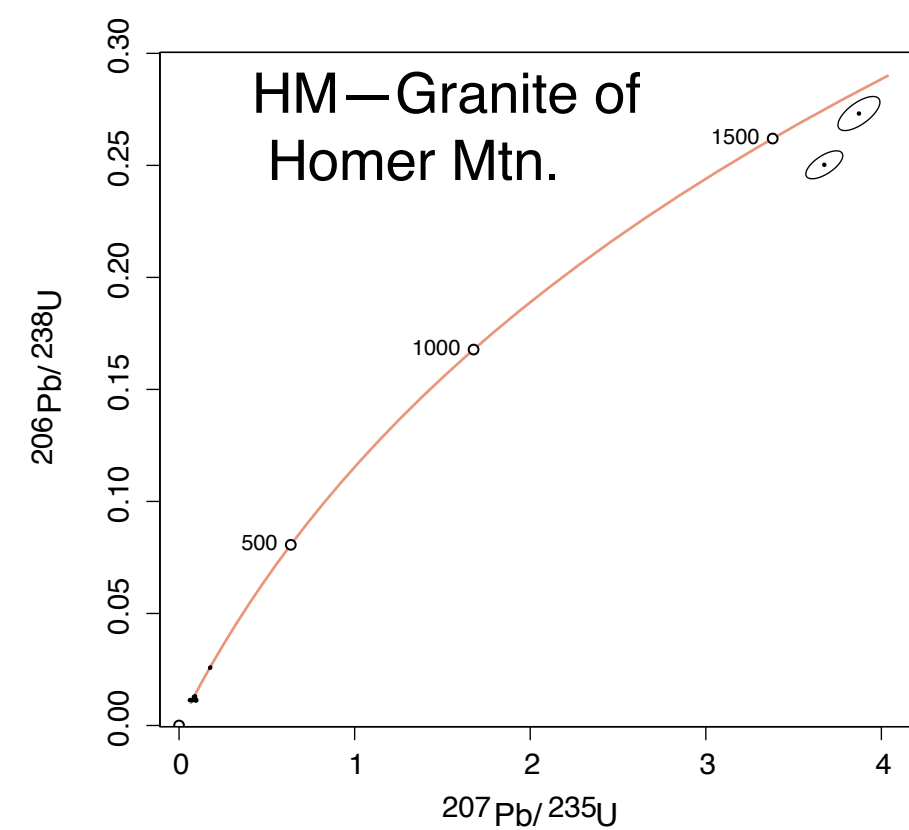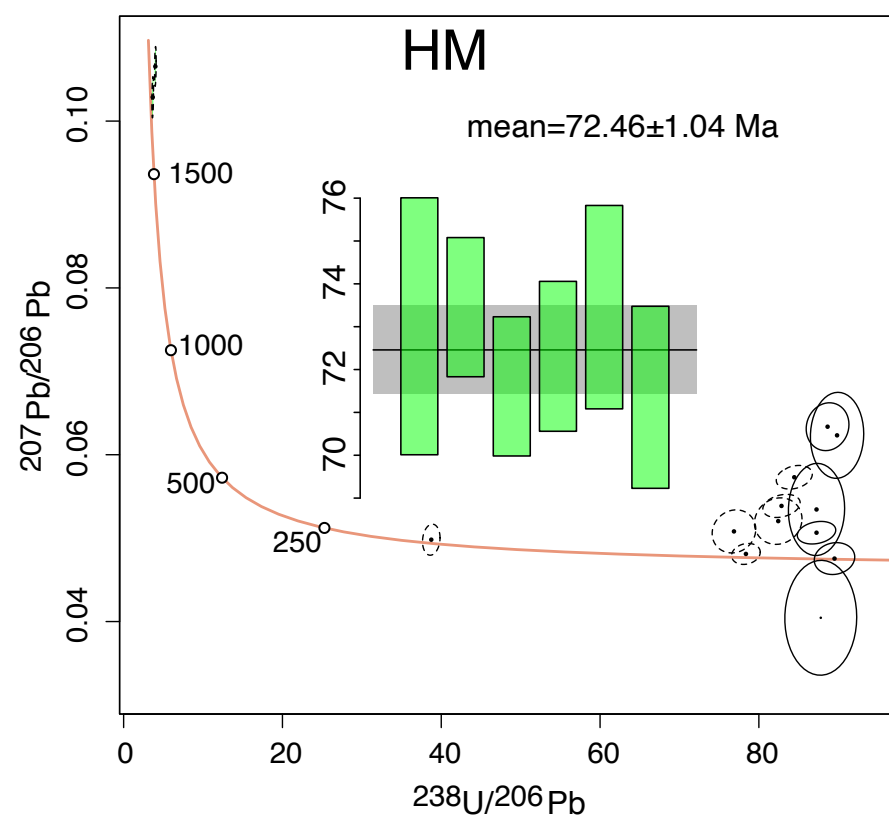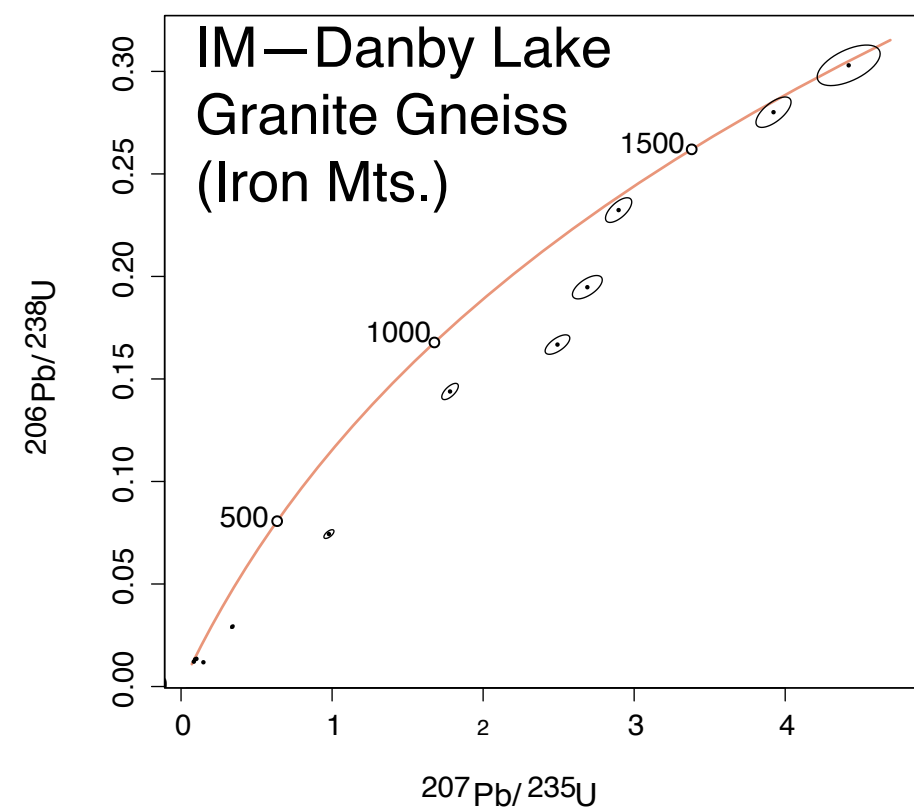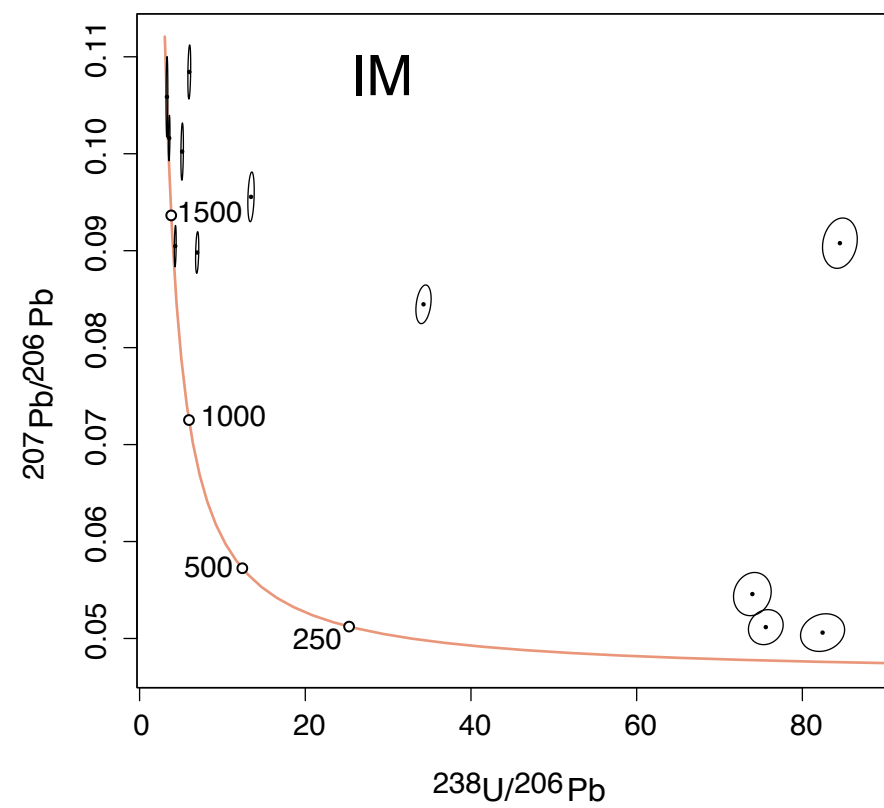

Fig. DR-1a

Supplement: Supplementary file 1 [file 1]

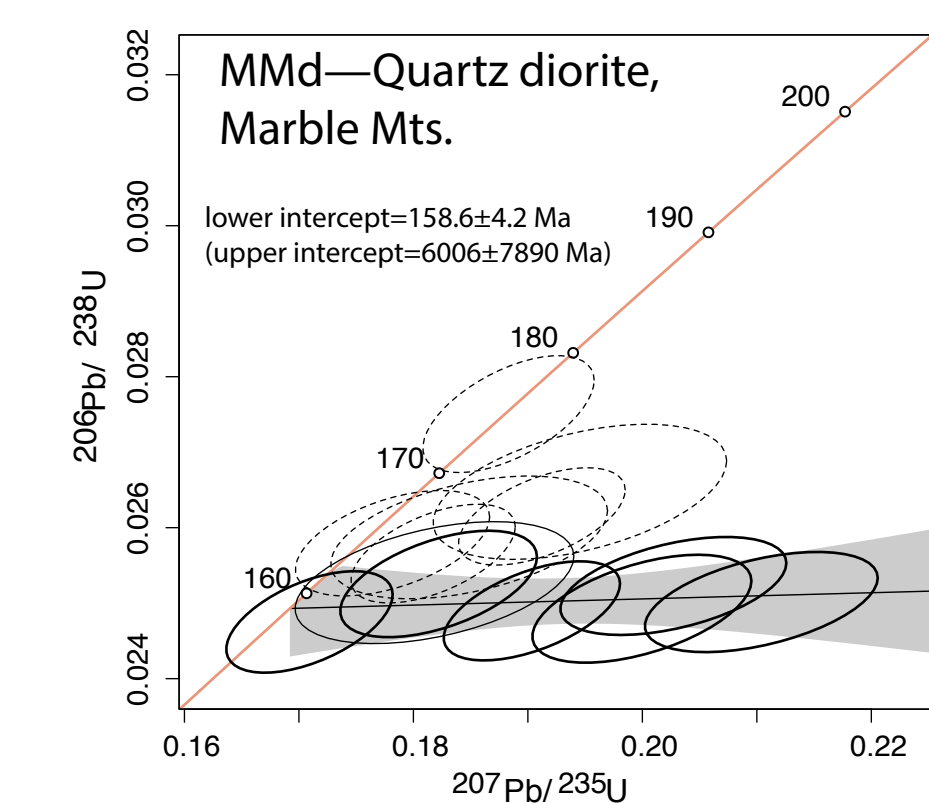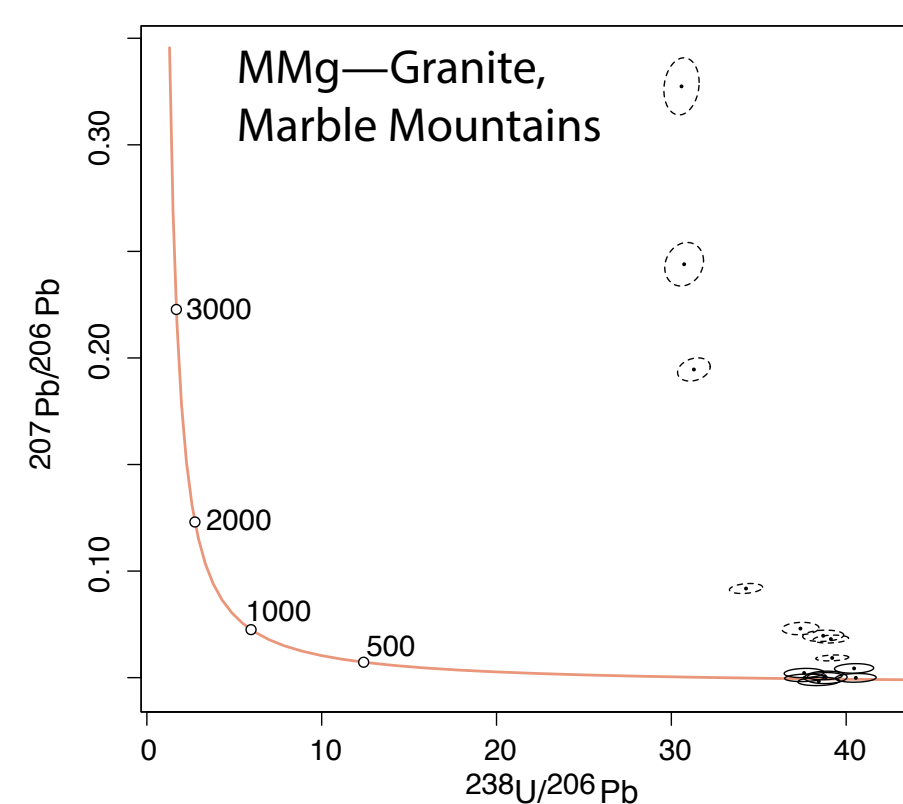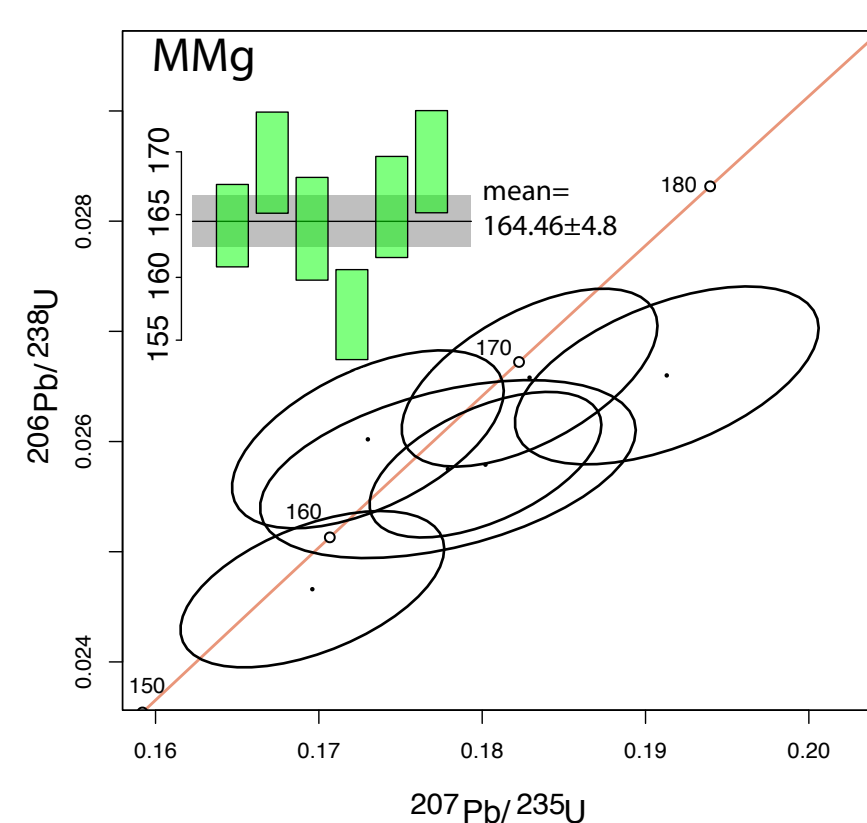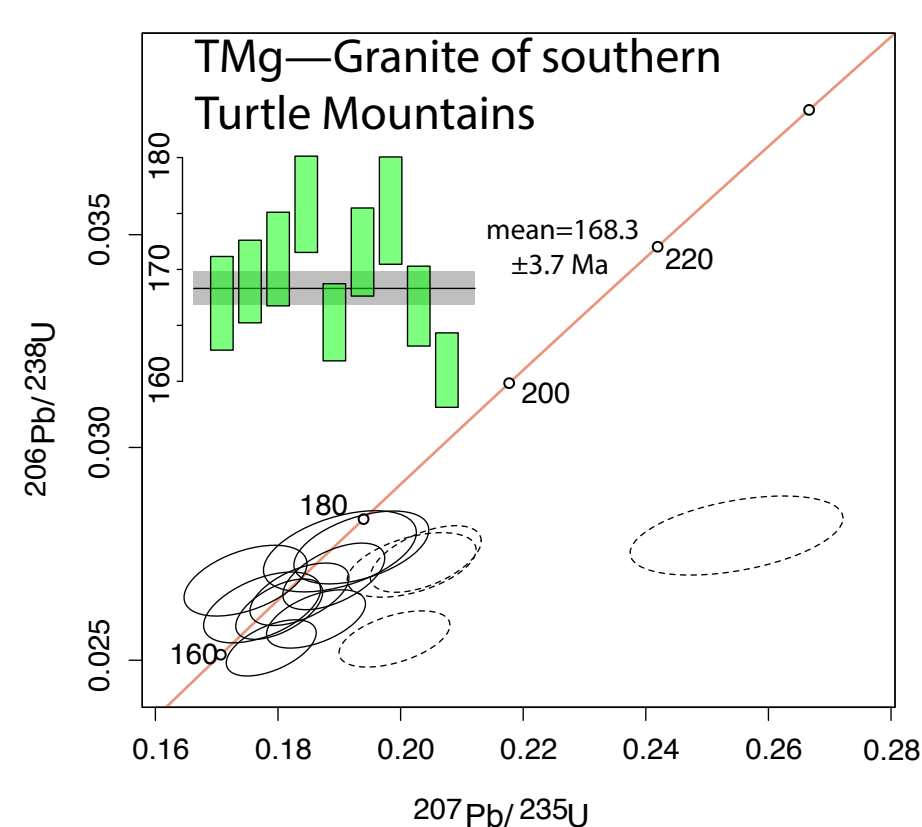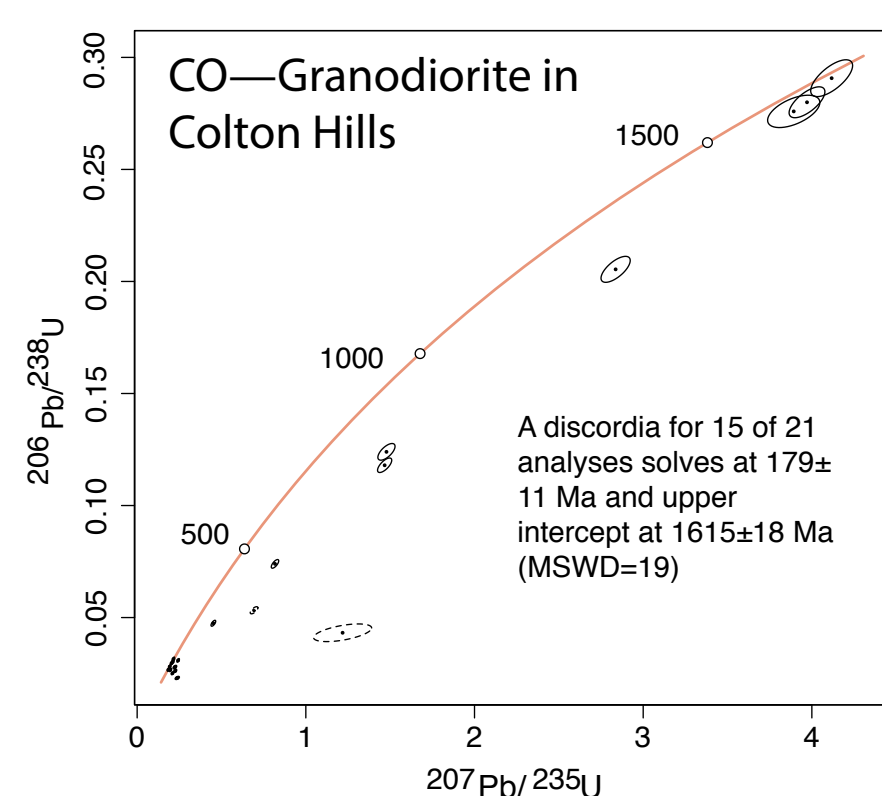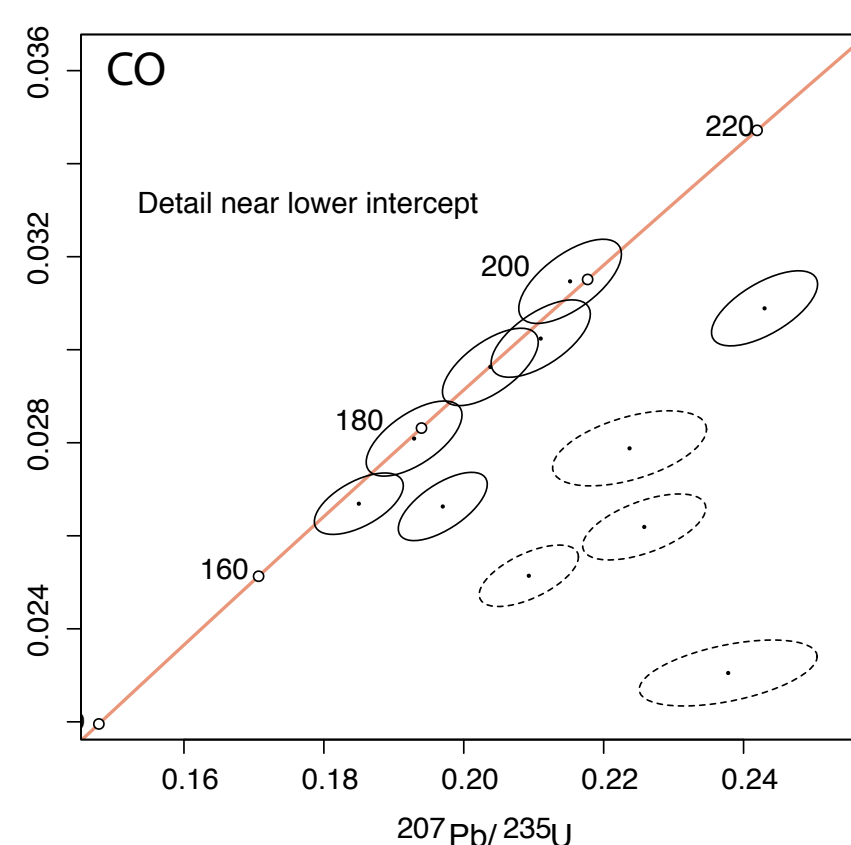

Fig. DR-1c

Supplement: Supplementary file 2 [file 1]

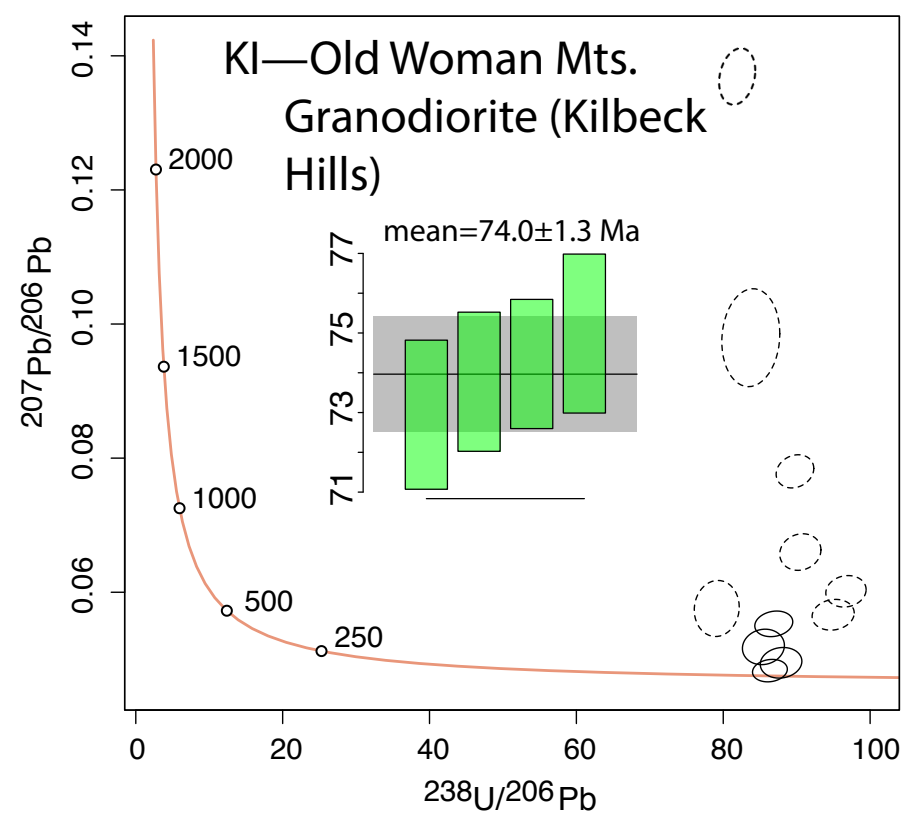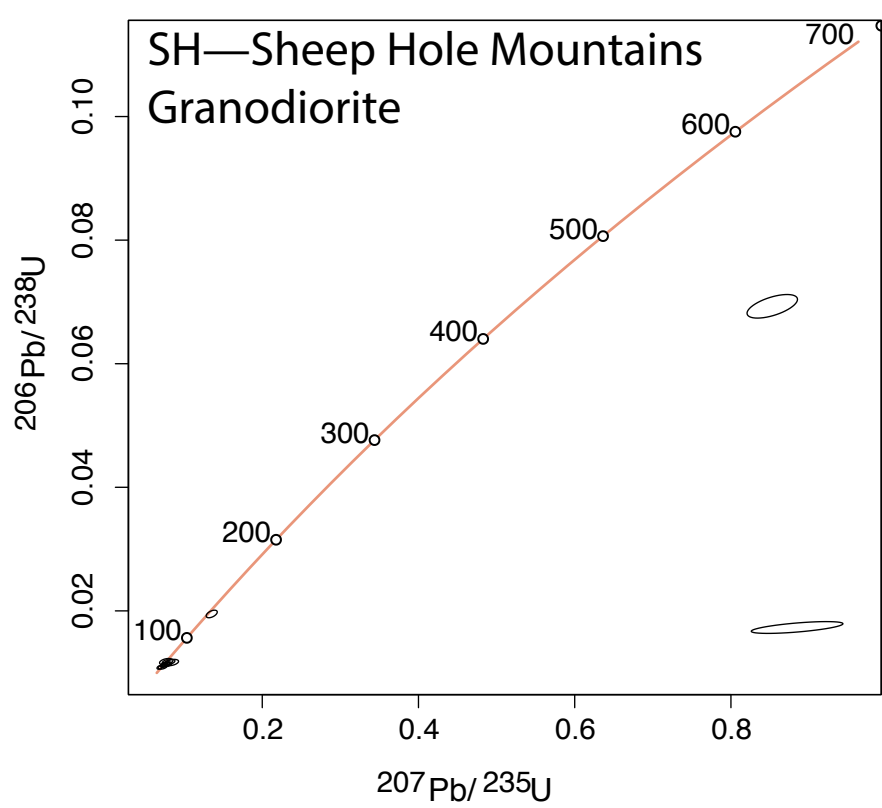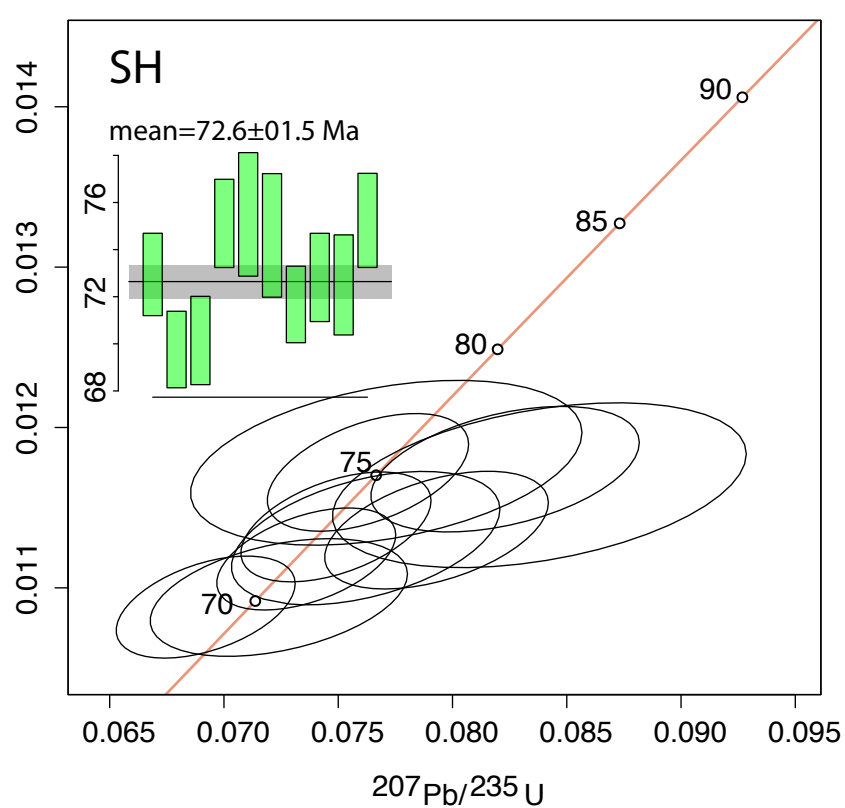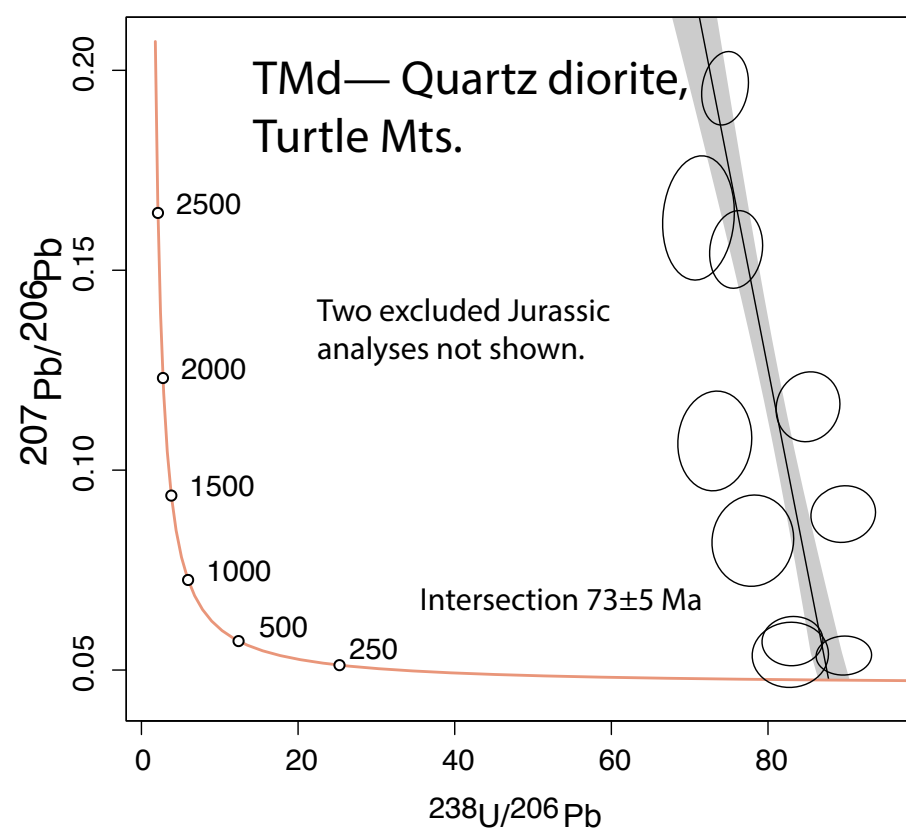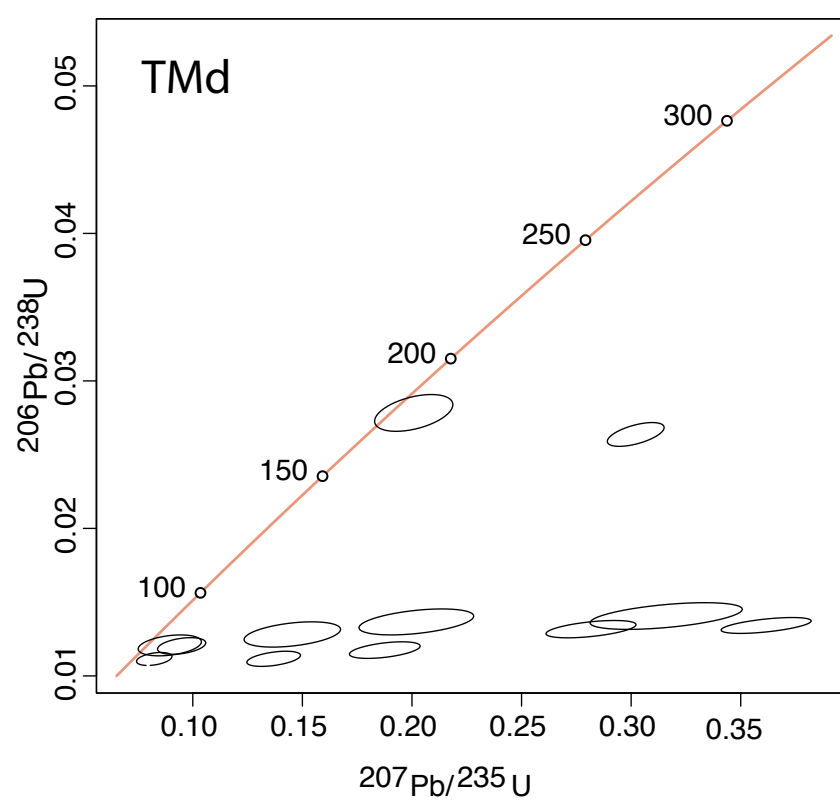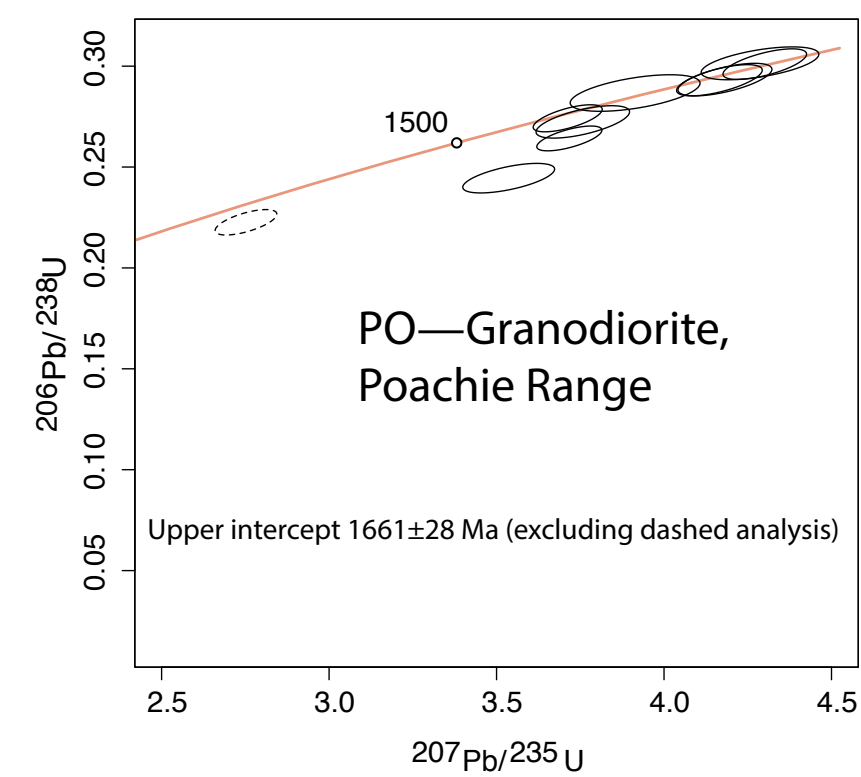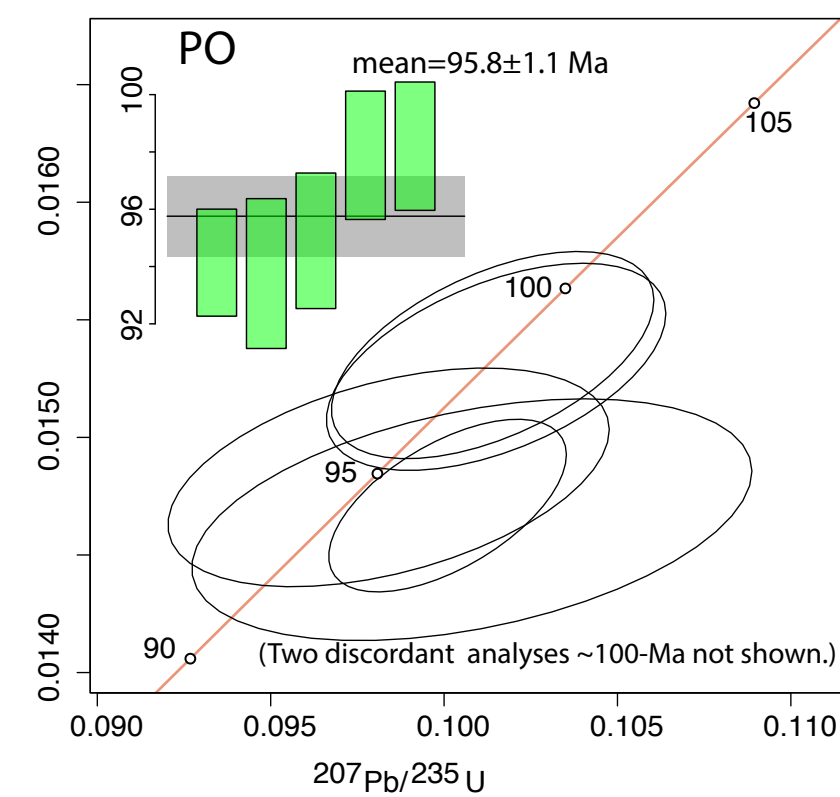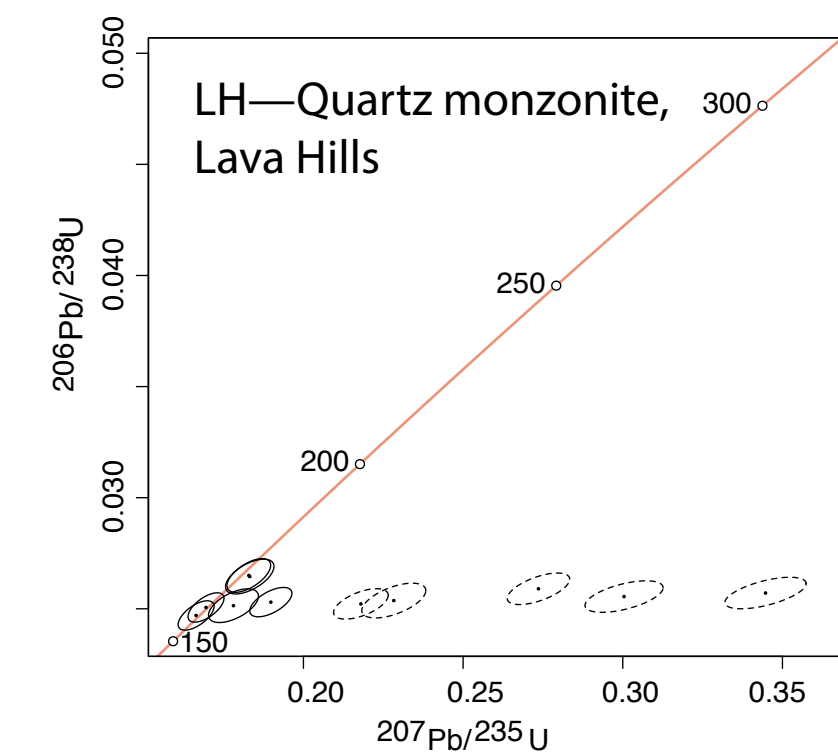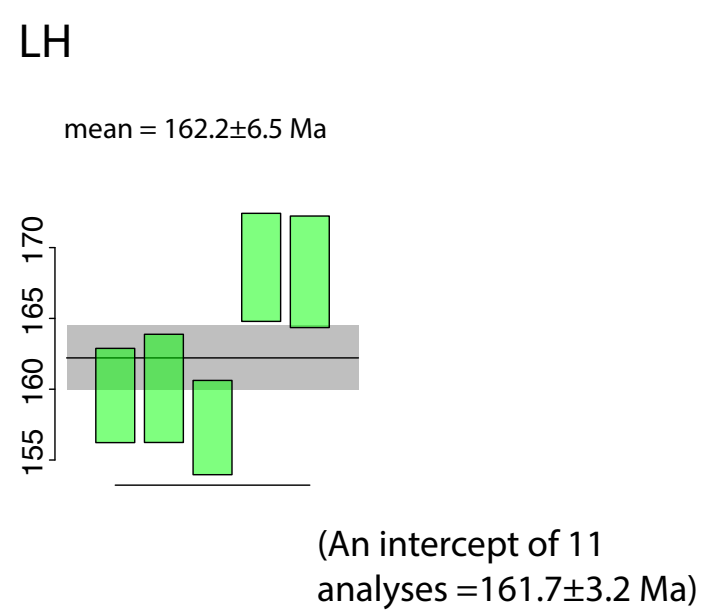

Fig. DR-1b

Supplement: Supplementary file 3 [file 1]
